# Supplementary material
Source: Research Square preprint supplement (doi:10.21203/rs.3.rs-9178656/v1)
Supplement: Supplementary file 1 [file 3fa6c8bc62ec153449967224.docx]

**Table S 1**

Association of sociodemographic and clinical variables with perinatal depressive symptoms

|  | EPDS I | EPDS II |
| --- | --- | --- |
| Place of residence | .11 | .11 |
| Financial status | -.12 | -.18 |
| Education | .07 | -.07 |
| Parity | -.02 | -.11 |
| Marital status | .04 | -.19 |
| Postpartum depression in mother or sister | .15 | .08 |
| Miscarriages in the past | .06 | .05 |
| Symptoms of threatened miscarriage in the first trimester | .03 | .15 |
| Caesarean section | -.05 | .09 |
| Child’s sleep | -.03 | .03 |

*Note.* EPDS = Edinburgh Postpartum Depression Scale; I = measurement in the first trimester; II = measurement after delivery
